# Supplementary material
Source: publisher figshare collection journal article supplement (https://geolsoc.figshare.com/ndownloader/files/12298595)
Supplement: Supplementary file 1 [file 12298595]

**Table 1**. *AFTA data, sample details and associated thermal history interpretations; southernmost Norway*

| Sample  number | Lat/  Long | Stratigraphic  division | Strati-graphic Age*1  (Ma) | Elevation  (m asl) | D*2  (106  tracks  /cm2) | s*2  (106  tracks  /cm2) | i*2  (106  tracks  /cm2) | P(2) *3  (%)  (no. of  grains) | Fission track age*4  (Ma) | Mean  track  length*5  (μm) | Std  Dev*6  (μm) | Thermal history constraints*7 |
| --- | --- | --- | --- | --- | --- | --- | --- | --- | --- | --- | --- | --- |
|  |  |  |  |  |  |  |  |  |  |  |  |  |
| GC361-21 | 59.142  /5.250 | Caledonian | ~400 | 5 | 1.403 (4414) | 0.652 (336) | 1.007 (519) | 5  (20) | 155.7 ± 15.3* | 13.1 ± 0.6 (14) | 2.07 | >110°C, 226-156 Ma  78-100°C, 180-60 Ma  28-78°C,75-0 Ma |
| GC361-22 | 58.778  /5.375 | Silurian | 439-409 | 10 | 1.413 (4414) | 3.150 (1792) | 3.379 (1922) | 10  (20) | 228.5 ± 8.9 | 13.1 ± 0.2 (106) | 1.74 | >110°C, >263 Ma  91-104°C, 255-177 Ma  52-65°C, 75-0 Ma |
| GC361-25 | 60.372  /5.300 | Precambrian | 570 | 15 | 1.445 (4414) | 1.000 (636) | 1.510 (961) | 24  (20) | 166.7 ± 9.2 | 13.6 ± 0.2 (80) | 1.41 | >110°C ,207-168 Ma  74-100°C.186-23 Ma  40-60°C,78-0 Ma |
| GC361-71 | 60.372  /5.300 | Precambrian basement | >542 | -800 | 1.490 (2351) | 0.423 (309) | 0.656 (479) | 2  (25) | 162.8 ± 19.1* | 11.9 ± 0.3 (18) | 1.46 | >100°C, 251-176 Ma  73-105°C, 232-133 Ma  65-89°C, 69-0 Ma |
| GC361-72 | 60.372/  5.300 | Precambrian basement | >542 | -1480 | 1.499 (2351) | 1.988 (249) | 2.683 (336) | 79  (4) | 193.4 ± 16.8 | 10.3 ± 0.8 (19) | 3.47 | >110°C, >333 Ma  97-102°C, 202-52 Ma  55-82°C, 62-0 Ma |
| GC361-73 | 58.929/  5.705 | Precambrian basement | >542 | 0 | 1.508 (2351) | 1.726 (1382) | 1.974 (1580) | <1  (20) | 225.5 ± 16.2* | 13.4 ± 0.2 (115) | 1.70 | >110°C, 411-277 Ma  97-106°C, 255-195 Ma  55-70°C, 104-25 Ma |
| GC361-74 | 59.049/  6.578 | Precambrian basement | >542 | 75 | 1.517 (2351) | 3.412 (979) | 4.610 (1323) | <1  (20) | 204.2 ± 14.5* | 12.9 ± 0.2 (101) | 1.76 | >110°C, 305-215 Ma  89-103°C, 230-164 Ma  60-74°C, 85-21 Ma |
| GC361-75 | 59.049/  6.578 | Precambrian basement | >542 | 440 | 1.527 (2351) | 0.644 (600) | 0.849 (791) | <1  (20) | 197.3 ± 17.1* | 13.0 ± 0.1 (106) | 1.33 | >110°C, 259-209 Ma  69-96°C, 231-81 Ma  42-65°C, 39-0 Ma |
| GC361-76 | 59.049/  6.578 | Precambrian basement | >542 | 990 | 1.536 (2351) | 2.644 (1674) | 3.226 (2042) | 2  (20) | 220.3 ± 10.3* | 13.5 ± 0.2 (116) | 1.63 | >110°C, >234 Ma  82-104°C, 244-177 Ma  45-63°C, 102-0 Ma |

| GC970-31 | 59.882/  8.452 | Precambrian basement | >542 | 1227 | 1.413 (2221) | 0.735 (560) | 0.781 (595) | 76  (20) | 251.4 ± 16.0 | 14.4 ± 0.1 (99) | 1.14 | >102°C, 305-227 Ma  49-81°C, 263-151 Ma  <50°C, 151-0 Ma |
| --- | --- | --- | --- | --- | --- | --- | --- | --- | --- | --- | --- | --- |
| GC970-32 | 59.902/  8.497 | Precambrian basement | >542 | 1046 | 1.416 (2221) | 1.422 (1013) | 1.680 (1197) | <1  (20) | 230.0 ± 15.0* | 13.3 ± 0.1 (111) | 1.21 | >102°C, 274-231 Ma  59-83°C, 248-38 Ma  10-63°C, 73-0 Ma |
| GC970-33 | 59.888/  8.586 | Precambrian basement | >542 | 866 | 1.419 (2221) | 0.857 (349) | 1.203 (490) | 70  (14) | 191.9 ± 14.2 | 13.8 ± 0.1 (106) | 1.21 | >104°C, 252-178 Ma  48-72°C, 172-32 Ma  10-62°C, 116-0 Ma |
| GC970-34 | 59.883  /8.588 | Precambrian basement | >542 | 656 | 1.422 (2221) | 1.545 (909) | 1.992 (1172) | 23  (20) | 209.1 ± 10.5 | 13.3 ± 0.1 (109) | 1.26 | >110°C, 257-216 Ma  69-90°C, 227-122 Ma  39-57°C, 40-0 Ma |
| GC970-35 | 69.882/  8.594 | Precambrian basement | >542 | 433 | 1.425 (2221) | 0.836 (429) | 1.396 (716) | 4  (20) | 163.8 ± 13.1* | 13.2 ± 0.1 (105) | 1.25 | >103°C, 217-159 Ma  59-70°C, 59-10 Ma |
| GC970-71 | 58.383/  6.058 | Precambrian basement | >542 | 5 | 1.506 (2265) | 0.129 (24) | 0.177 (33) | 100 (20) | 205.1 ± 55.3 | 13.8 ± 0.2 (2) | 0.28 | >100°C, 435-37 Ma |
| GC970-72 | 58.341/  6.347 | Precambrian basement | >542 | 152 | 1.516 (2265) | 0.649 (109) | 0.863 (145) | 94  (20) | 213.2 ± 27.6 | 13.5 ± 0.2 (49) | 1.08 | >110°C, 297-183 Ma  40-100°C, 183-40 Ma  46-64°C, 67-0 Ma |
| GC970-73 | 58.226/  7.010 | Precambrian basement | >542 | 225 | 1.299 (2048) | 1.807 (407) | 1.980 (446) | 100 (20) | 221.6 ± 16.3 | 13.3 ± 0.1 (101) | 1.34 | >110°C, 286-218 Ma  69-93°C, 236-79 Ma  31-65°C, 66-0 Ma |

| GC970-74 | | 59.893/  73274 | | Precambrian basement | >542 | 47 | | 1.299 (2048) | 0.874 (116) | | 1.039 (138) | | 100 (20) | | 204.5 ± 26.3 | | 13.5 ± 0.1 (100) | | 1.21 | | >106°C, 296-158 Ma  ??? , ???  49-62°C, 66-0 Ma | |
| --- | --- | --- | --- | --- | --- | --- | --- | --- | --- | --- | --- | --- | --- | --- | --- | --- | --- | --- | --- | --- | --- | --- |
| GC970-75 | | 58.201/  7.93 | | Precambrian basement | >542 | 32 | | 1.300 (2048) | 0.433 (147) | | 0.515 (175) | | 90  (20) | | 204.4 ± 23.5 | | 12.6 ± 0.2 (86) | | 1.56 | | >110°C, 317-201 Ma  86-100°C, 258-132 Ma  55-65°C, 32-0 Ma | |
| GC970-76 | | 58.339/  7.811 | | Precambrian basement | >542 | 229 | | 1.300 (2048) | 2.046 (354) | | 2.074 (359) | | 38  (20) | | 239.3 ± 19.0 | | 12.8 ± 0.1 (100) | | 1.26 | | >110°C, 325-243 Ma  69-94°C, 281-33 Ma  28-69°C, 48-0 Ma | |
| GC970-77 | 58.537/  7.777 | | Precambrian basement | | >542 | 199 | 1.300 (2048) | | 3.528 (957) | 4.332 (1175) | | 33  (20) | | 198.3 ± 10.1 | | 12.8 ± 0.1 (100) | | 0.99 | | >103°C, 260-205 Ma  62-82°C, 250-0 Ma  62-70°C, 30-0 Ma | |
| GC970-78 | 57.717/  7.825 | | Precambrian basement | | >542 | 197 | 1.301 (2048) | | 0.914 (188) | 0.894 (184) | | 97  (20) | | 247.9 ± 26.5 | | 12.7 ± 0.2 (101) | | 1.51 | | >110°C, 351-235 Ma  68-82°C, 198-38 Ma  20-67°C, 50-0 Ma | |
| GC970-79 | 58.853/  7.740 | | Precambrian basement | | >542 | 220 | 1.301 (2048) | | 0.731 (232) | 0.741 (235) | | 76  (20) | | 239.7 ± 23.1 | | 12.9 ± 0.1 (100) | | 1.39 | | >110°C, 335-234 Ma  71-92°C, 284-88 Ma  40-67°C, 59-0 Ma | |
| GC970-80 | 59.018/  7.553 | | Precambrian basement | | >542 | 229 | 1.301 (2048) | | 0.712 (240) | 0.934 (315) | | 93  (20) | | 185.8 ± 16.7 | | 13.0 ± 0.1 (99) | | 1.40 | | >110°C, 256-183 Ma  73-97°C, 226-74 Ma  42-70°C, 72-0 Ma | |
| GC970-81 | 59.129/  7.512 | | Precambrian basement | | >542 | 297 | 1.301 (2048) | | 0.096 (29) | 0.146 (44) | | 98  (20) | | 161.1 ± 38.8 | | 12.4 ± 0.6 (15) | | 2.36 | | >110°C, >133 Ma  81-105°C, 270-43 Ma  38-91°C, 153-0 Ma | |
| GC970-82 | 58.580/  8.156 | | Precambrian basement | | >542 | 197 | 1.302 (2048) | | 0.739 (207) | 0.843 (236) | | 100 (20) | | 213.6 ± 21.1 | | 13.4 ± 0.2 (38) | | 1.54 | | >110°C, 294-201 Ma  74-100°C, 262-136 Ma  38-68°C, 123-0 Ma | |
| GC970-83 | 58.507/  8.564 | | Precambrian basement | | >542 | 79 | 1.302 (2048) | | 2.169 (628) | 3.043 (881) | | 28  (20) | | 174.1 ± 10.2 | | 12.5 ± 0.1 (103) | | 1.34 | | >110°C, >189 Ma  68-112°C, 222-19 Ma  65-75°C, 40-0 Ma | |
| GC970-84 | 58.850/  9.397 | | Precambrian basement | | >542 | 26 | 1.302 (2048) | | 3.766 (647) | 4.272 (734) | | 98  (20) | | 214.7 ± 12.9 | | 14.0 ± 0.1 (100) | | 1.05 | | >130°C, 263-200 Ma  ??? , ???  48-70°C, 93-0 Ma | |

*1 All numerical values for stratigraphic ages assigned following Gradstein et al. (2012).

*2 s = spontaneous track density. i = induced track density. D = glass dosimeter track density. Numbers in parentheses show the number of tracks counted. Numbers in parentheses show the number of tracks counted in determining all track densities.

*3 Probability that all single grain ages belong to a single population (Galbraith, 2005).

*4 Central age (Galbraith, 2005), used for samples containing a significant spread in single grain ages (P(2)<5%), otherwise the pooled age is quoted. All ages were calculated using the zeta calibration approach of Hurford & Green (1983), using zeta values for CN5 glass of 385.5±4.3 (samples GC970-21 to 35); 392.9±7.4 (samples GC970-36); 380.4±5.7 (samples GC970-71 to 84). All errors quoted at ± 1. All analytical details are as described by Green (1986), with the exception that thermal neutron irradiations for this study showed a significant flux gradient, and the appropriate value of D for each sample was determined by linear interpolation through the stack of grain mounts. Cl contents were determined as described in the text.

*5 Numbers in parentheses show the number of track lengths measured.

*6 Standard deviation of the track length distribution.

*7 Thermal history solutions derived from AFTA data based on assumed heating and cooling rates of 1°C/Ma and 10°C/Ma, respectively. Quoted ranges correspond to correspond to ±95% confidence limits on maximum/peak paleotemperature and onset of cooling in discrete episodes of heating and cooling. Text colour is coded to regional cooling events in Figure 9 (Orange: Palaeozoic event. Blue: Middle Triassic event. Green: Middle Jurassic event. Brown: early Miocene event). Constraints that are not consistent with the preferred timing for the major regional events are highlighted with a yellow background.

**References**

Gradstein, F.M., Ogg, J.G. and Hilgen, F.J. 2012: On The Geologic Time Scale. Newsletters on Stratigraphy **45**, 171–188.

Galbraith, R.F. 2005: Statistics for Fission Track Analysis 244 pp, 192. Boca Raton, FL, USA: Chapman and Hall/CRC.
